# Supplementary material for: The integrative epigenomic-transcriptomic landscape of ER positive breast cancer
Source: PubMed Central journal article supplement (PMC4673726; doi:10.1186/s13148-015-0159-0), 2015-12-09
Supplement: 13148_2015_159_MOESM1_ESM.pdf [file 13148_2015_159_MOESM1_ESM.pdf]

## **Additional File 1 for:**

### **The integrative epigenomic-transcriptomic landscape of ER positive breast cancer**

Yang Gao<sup>1</sup>, Allison Jones<sup>2</sup>, Peter A. Fasching<sup>3</sup>, Matthias Ruebner<sup>3</sup>, Matthias W. Beckmann<sup>3</sup>, Martin Widschwendter<sup>2</sup> and Andrew E. Teschendorff<sup>1,2,4\*</sup>

<sup>1</sup> CAS Key Lab for Computational Biology, CAS-MPG Partner Institute for Computational Biology, Chinese Academy of Sciences, Shanghai Institute for Biological Sciences, 320 Yue Yang Road, 200031 Shanghai, China. <sup>2</sup> Department of Women's Cancer, University College London, 74 Huntley Street, London WC1E 6BT, UK. <sup>3</sup> University Clinic Erlangen, Department of Gynaecology and Obstetrics, Friedrich-Alexander University Erlangen-Nuremberg, Erlangen, Germany. <sup>4</sup> Statistical Genomics Group, Paul O'Gorman Building, UCL Cancer Institute, University College London, 72 Huntley Street, London WC1E 6BT, United Kingdom.

\*Corresponding Author: [a.teschendorff@ucl.ac.uk](mailto:a.teschendorff@ucl.ac.uk), [andrew@picb.ac.cn](mailto:andrew@picb.ac.cn)

**SUPPLEMENTARY FIGURES:**

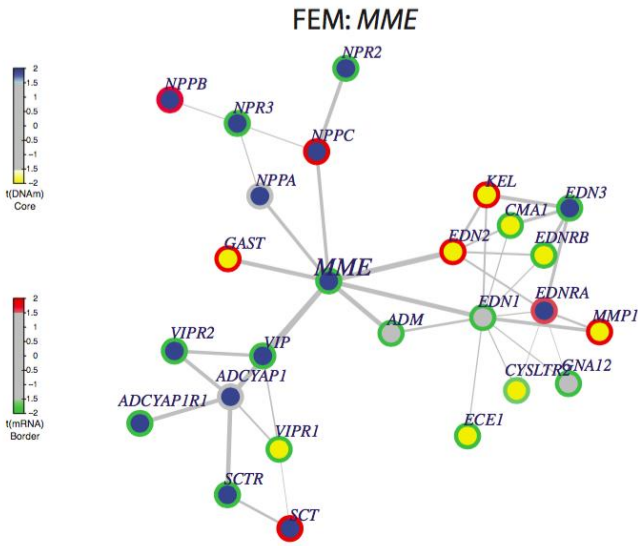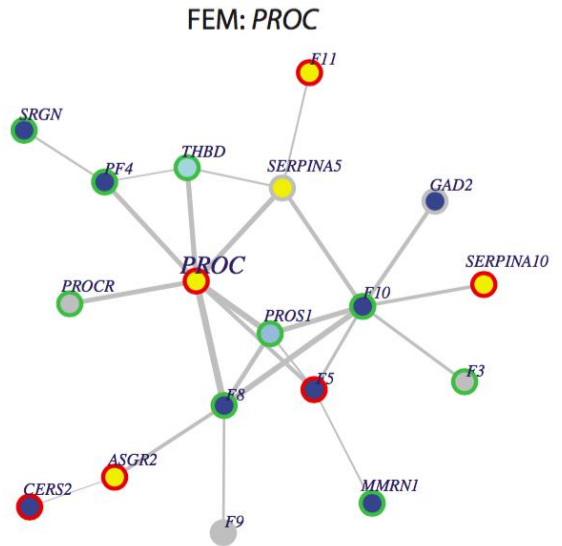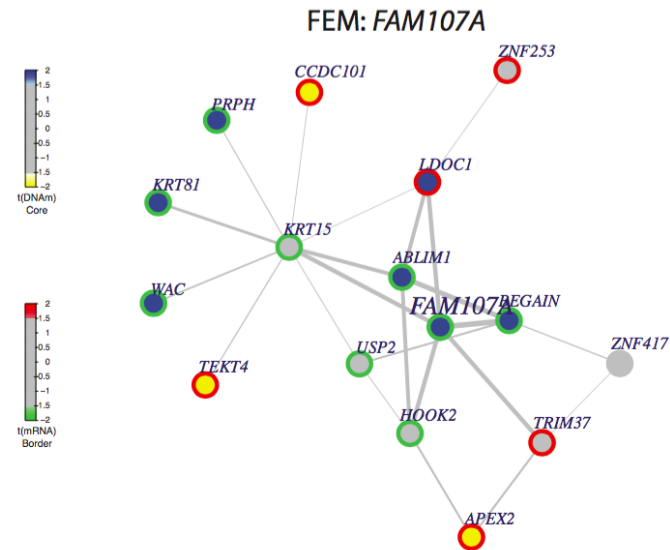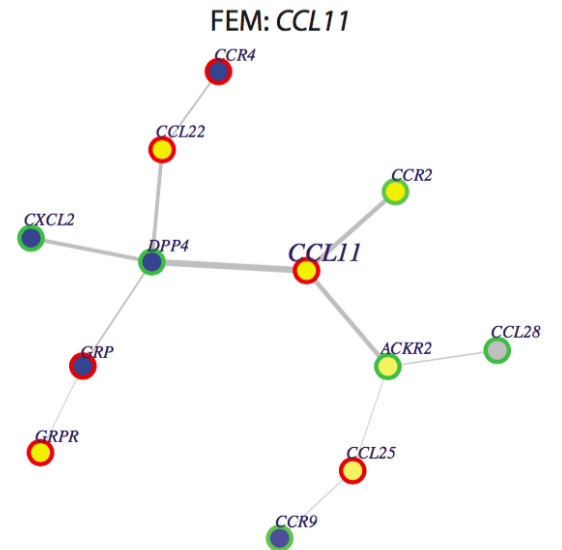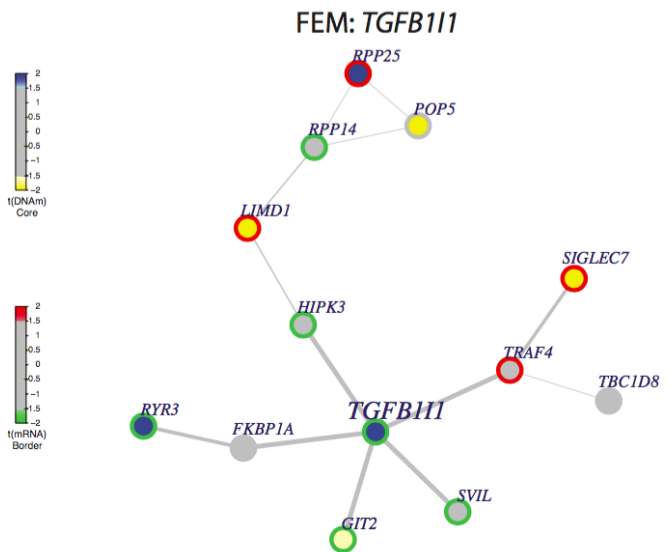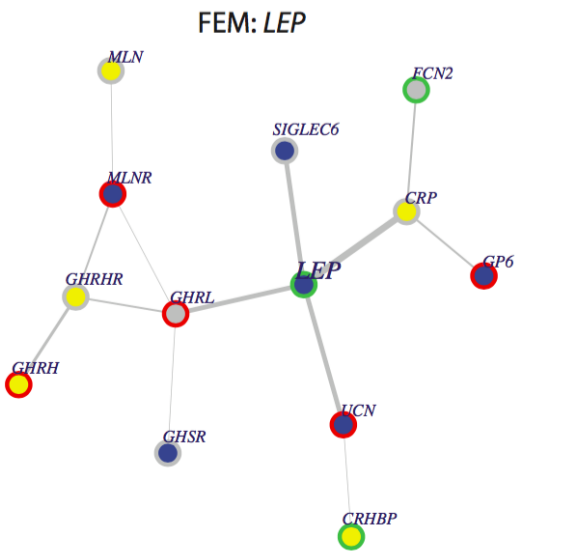

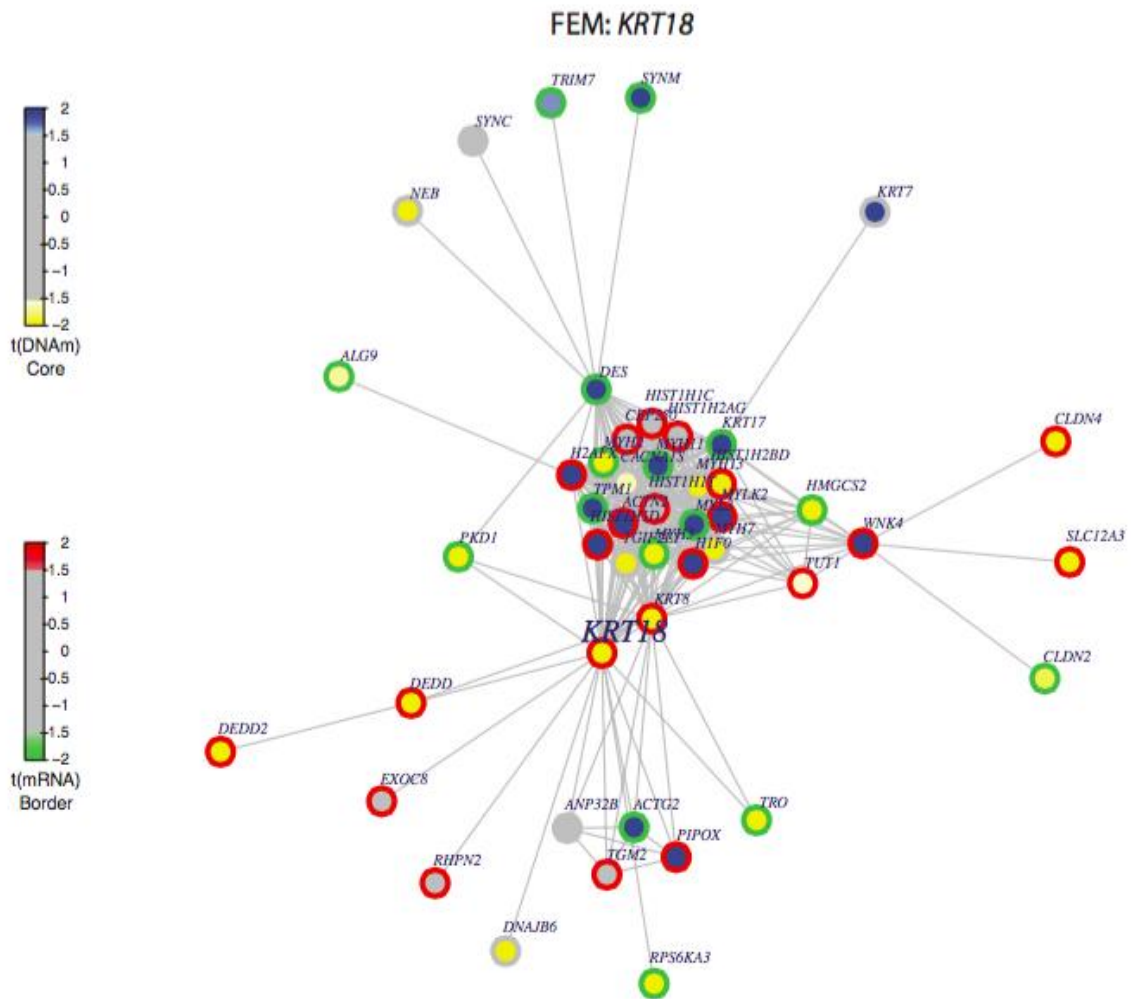

**Fig.S1:** Network representations of 7 of the 9 inferred FEM modules in ER+ breast cancer (the other 2 modules are shown in Fig.1B). Colors indicate directionality and significance of differential DNAm and mRNA expression, as shown, i.e. blue (yellow) nodes indicate promoter hypermethylation (hypomethylation) in cancer vs. normal, whereas red (green) borders indicates overexpression (underexpression) in cancer vs. normal.

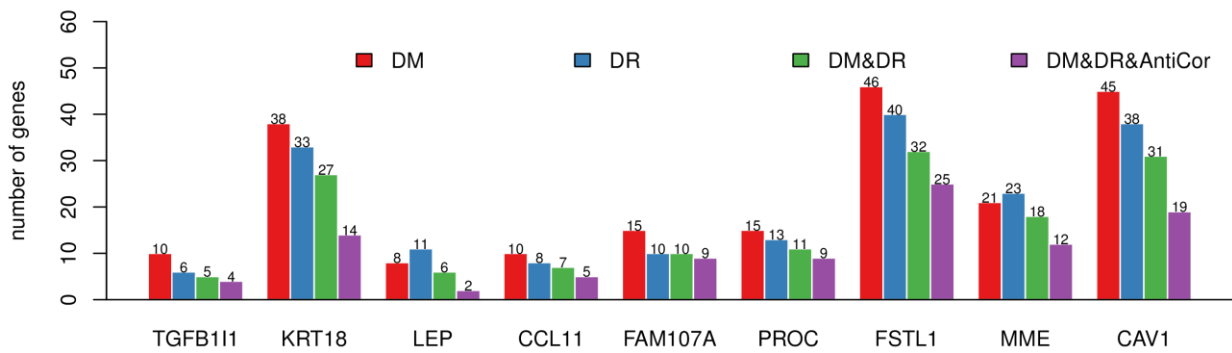

**Fig.S2:** For each FEM-module we give the numbers of differential methylated genes (DM), the number of differentially expressed genes (DR), the number of differentially methylated and differentially expressed ones (DM&DR) and the number of these which exhibited the anti-correlation between promoter differential methylation and differential expression (DM&DR&AntiCor). DM: significantly differentially methylated genes between normal and ER+ breast cancer samples found by computing moderated t statistics using empirical Bayes moderation of the standard errors and selecting those with p values < 0.05. DR: significantly differentially expressed genes between normal and ER+ breast cancer samples found by computing moderated t statistics using empirical Bayes moderation of the standard errors and selecting those with p values < 0.05.

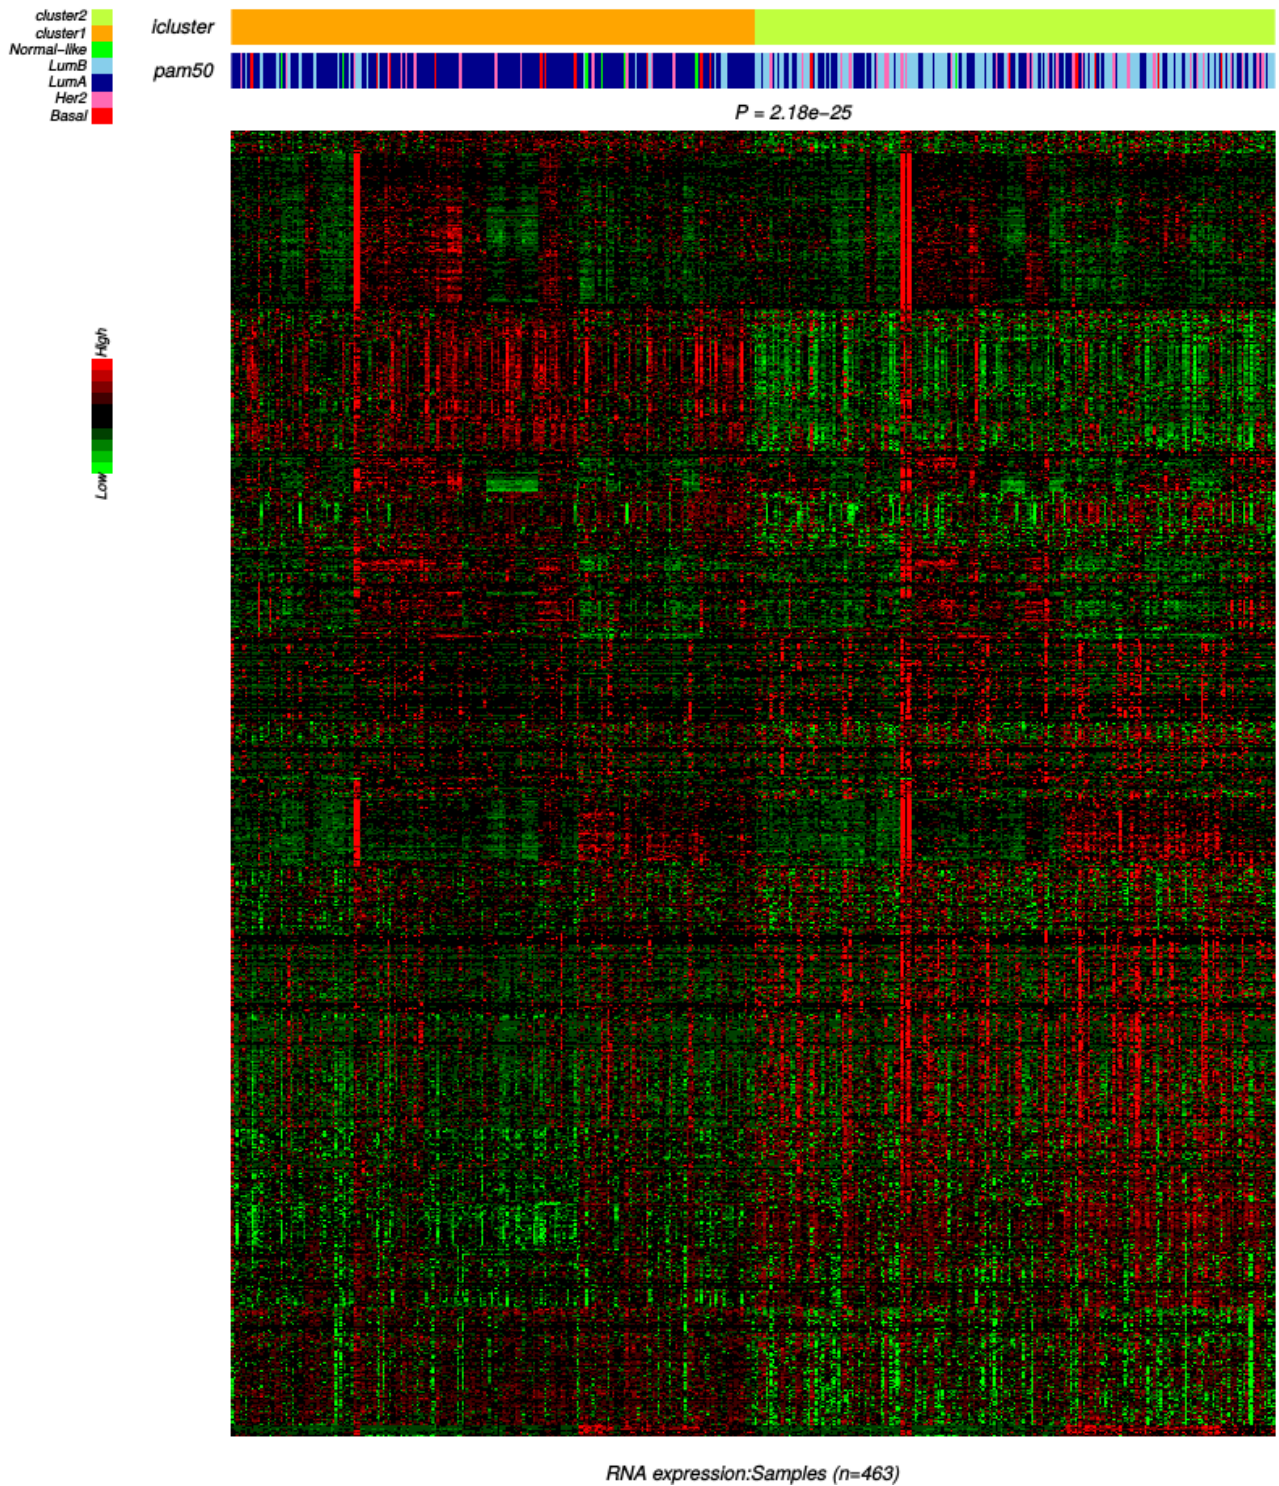

**Fig.S3-partA:** Integrative clustering of matched DNAm and mRNA data from 463 ER+ breast cancers using 4311 genes exhibiting an anti-correlative relation between differential methylation and differential expression (between normal and ER+ breast cancer). Upper barcode labels the icluster result, showing the distribution of samples according to inferred cluster. Lower barcode shows the intrinsic subtype (based on PAM50 classifier) of each sample. P-value is from a Fisher's exact test, comparing the distribution of the two luminal subtypes across the two clusters. Heatmap shows the expression value of these samples over the 4311 genes. Red indicates overexpression, whereas green indicates



underexpression.

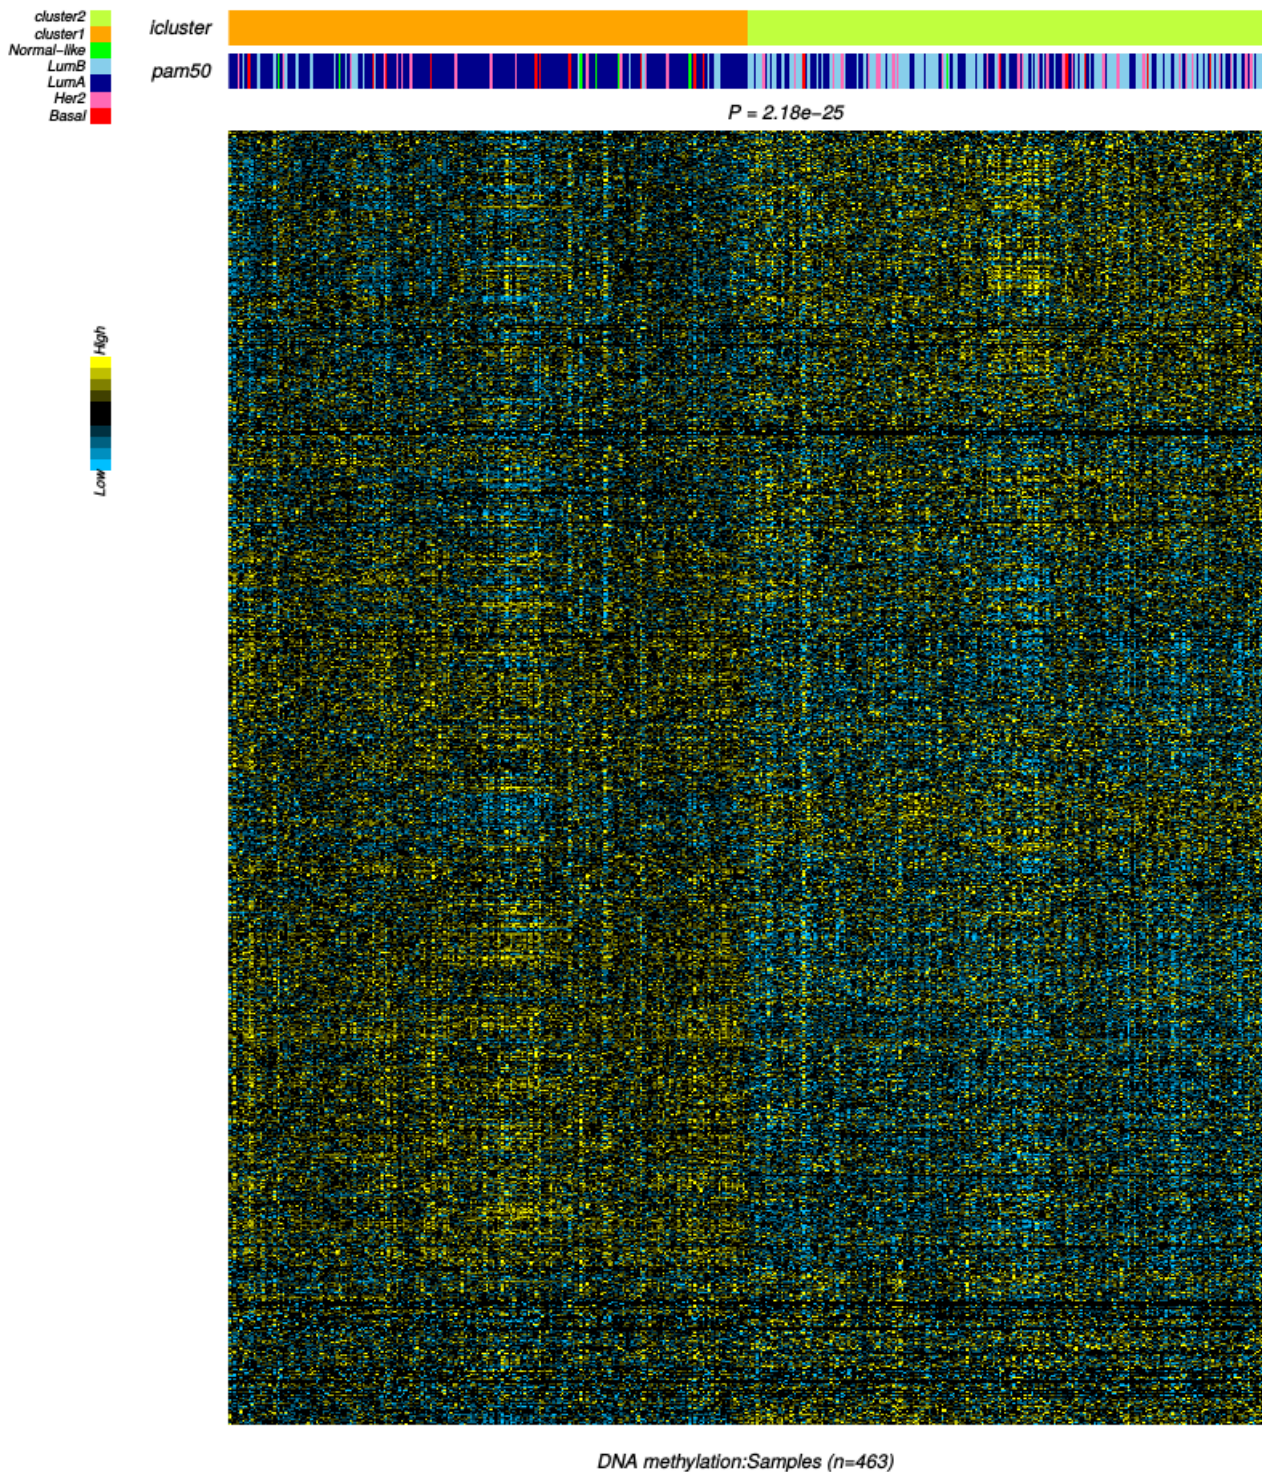

DNA methylation:Samples (n=463)

**Fig.S3-partB:** Integrative clustering of matched DNAm and mRNA data from 463 ER+ breast cancers using 4311 genes exhibiting an anti-correlative relation between differential methylation and differential expression (between normal and ER+ breast cancer). Upper barcode labels the icluster result, showing the distribution of samples according to inferred cluster. Lower barcode shows the intrinsic subtype (based on PAM50 classifier) of each sample. P-value is from a Fisher's exact test, comparing the distribution of the two luminal subtypes across

the two clusters. Heatmap shows the DNA methylation values of these samples over the 4311 genes. Yellow indicates hypermethylation, blue indicates hypomethylation.

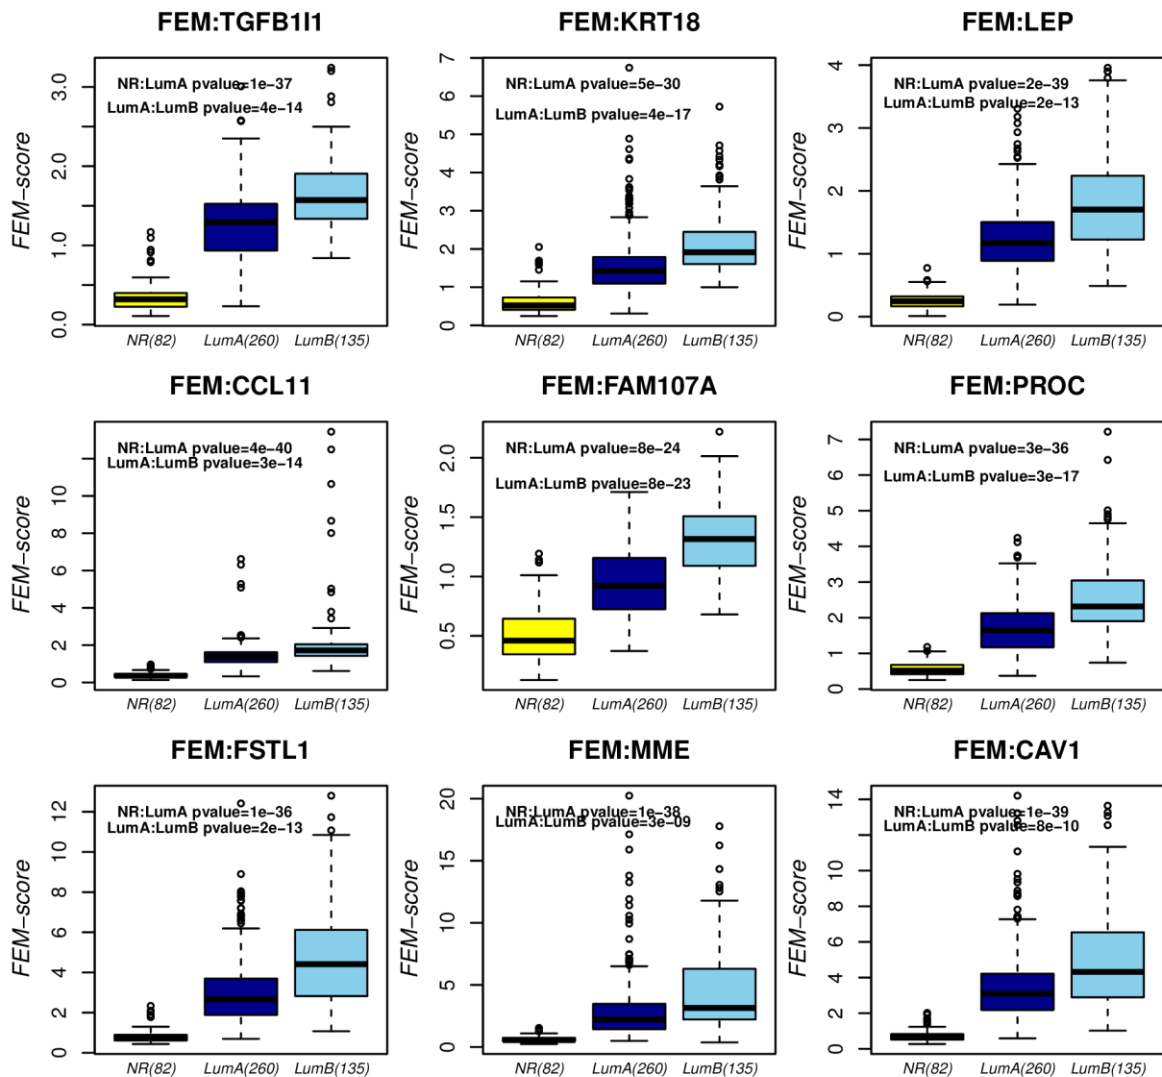

**Fig.S4:** Boxplots comparing the FEM scores of each FEM-module across the normal tissue samples (NR), luminal-A (lumA) and luminal-B (lumB) ER positive breast cancer from the TCGA breast cancer study. Number of samples in each group are indicated below boxplots. P-values are from a one-tailed Wilcoxon rank sum test.

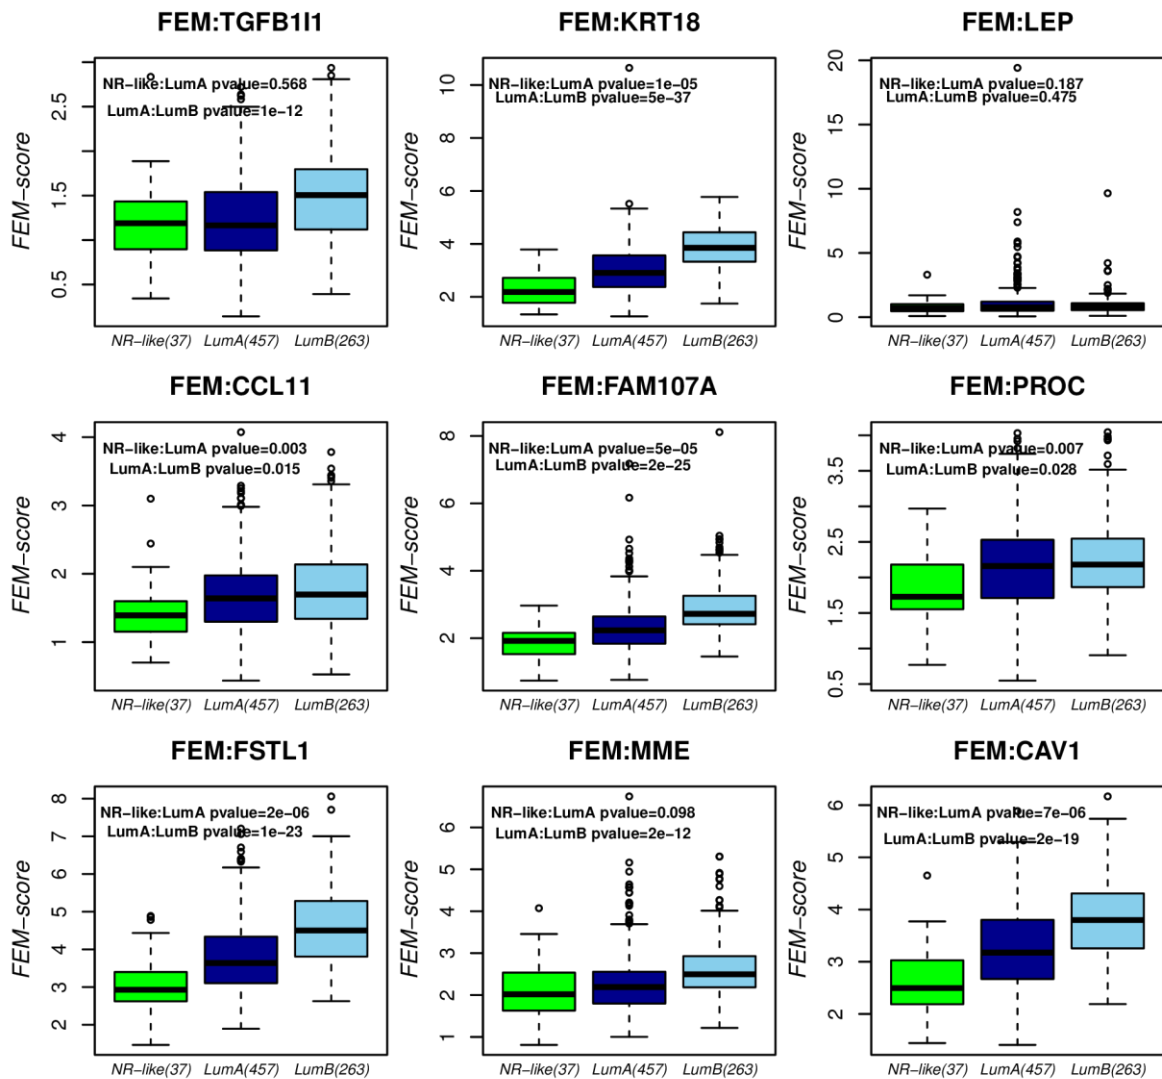

**Fig.S5:** FEM-scores of the FEM-modules inferred from the TCGA data in the METABRIC set. Boxplots compare the FEM scores across normal-like breast cancer (calibrated from normal-like subtype of TCGA dataset), luminal-A and luminal-B ER positive breast cancer. Because the METABRIC set only has mRNA expression data, the FEM scores were computed using only mRNA. Number of samples in each group are indicated below boxplots. P values are from a one-tailed Wilcoxon rank sum test.



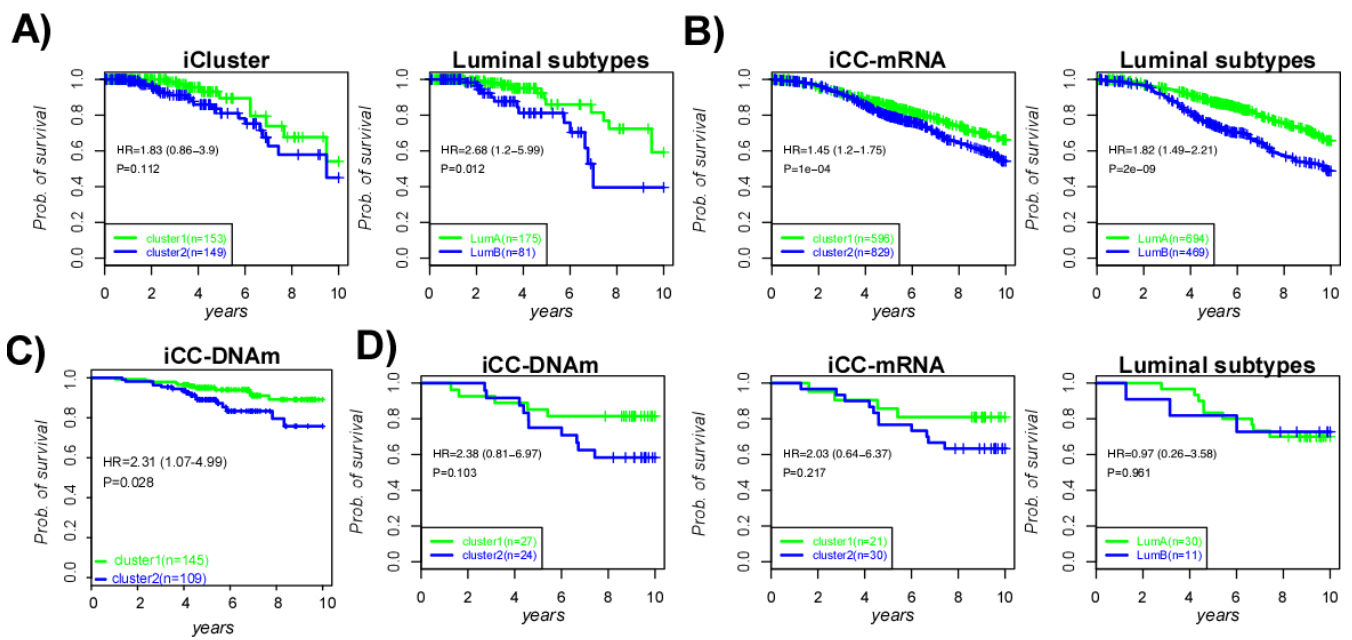

**Fig.S6: A)** Kaplan Meier Survival curves of the two integrative clusters predicted by iCluster on the matched TCGA Illumina 450k and RNA-Seq data, as well as those of luminal-A and B breast cancers. **B)** As A) but now for the predicted classification using the integrative cluster centroids (iCC) in the METABRIC expression set. **C)** As B) but now for the predicted classification in the “Germany” Illumina 450k DNAm set (this cohort had no expression data, so no luminal-classification is available). **D)** As B) but now for the predicted classification in the Fleischer data set for which there is both Illumina 450k DNAm and gene expression data (hence two different classifications iCC-DNAm and iCC-mRNA). In all panels, we provide the Hazard Ratio (HR), 95%CI and score-test P-values.

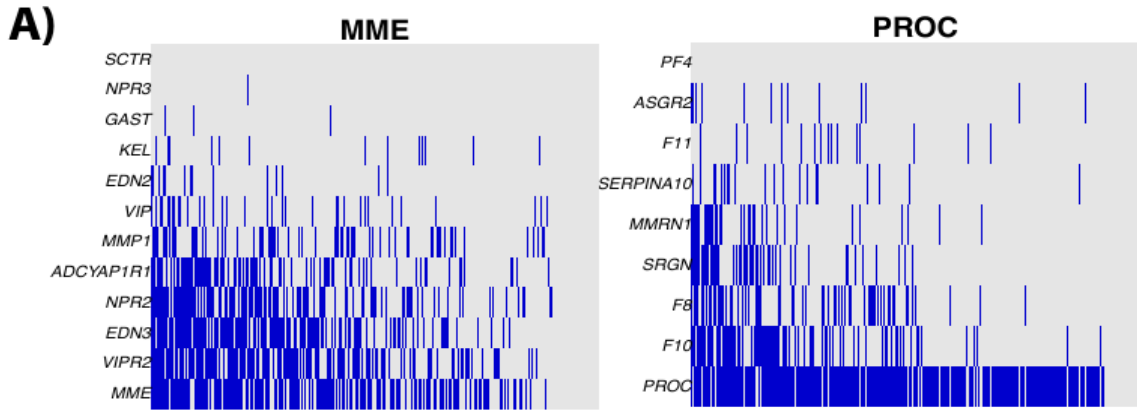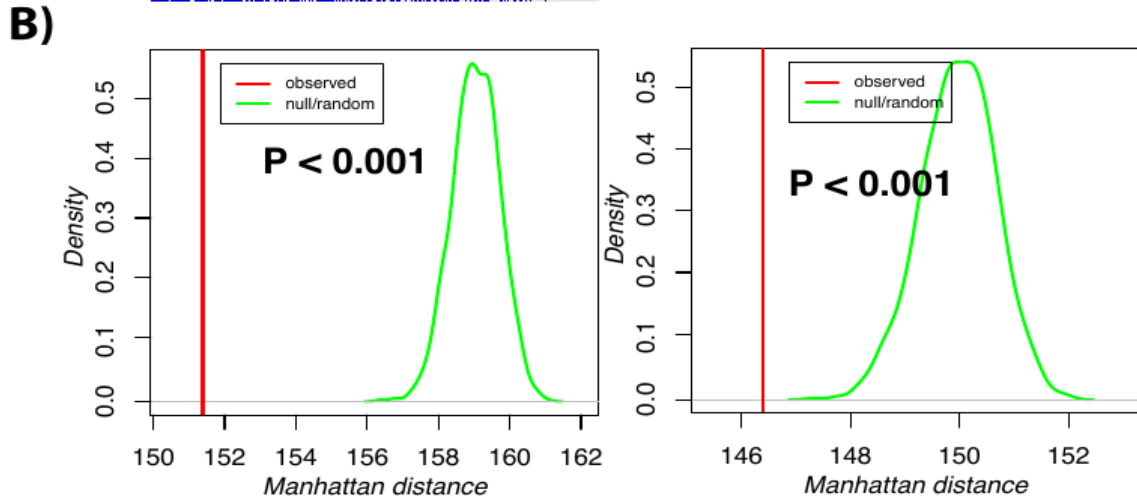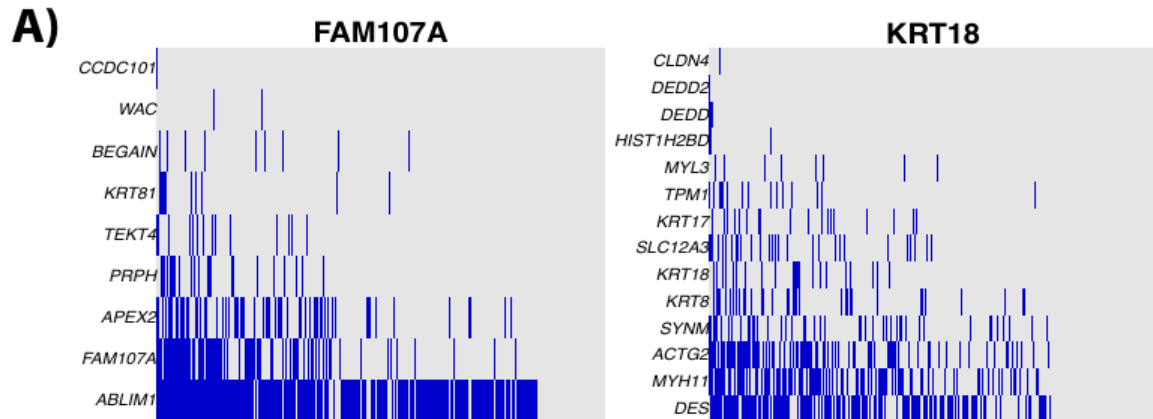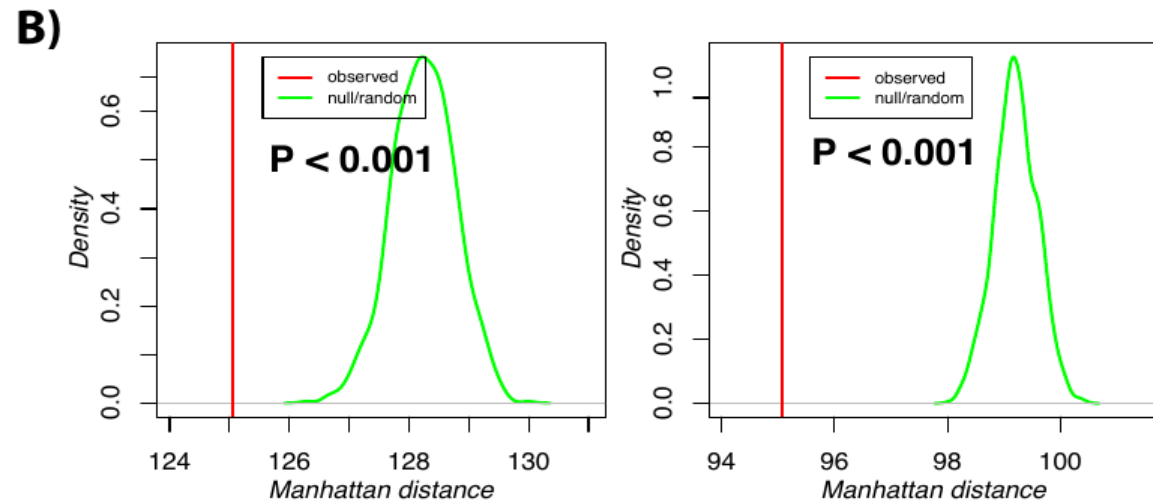

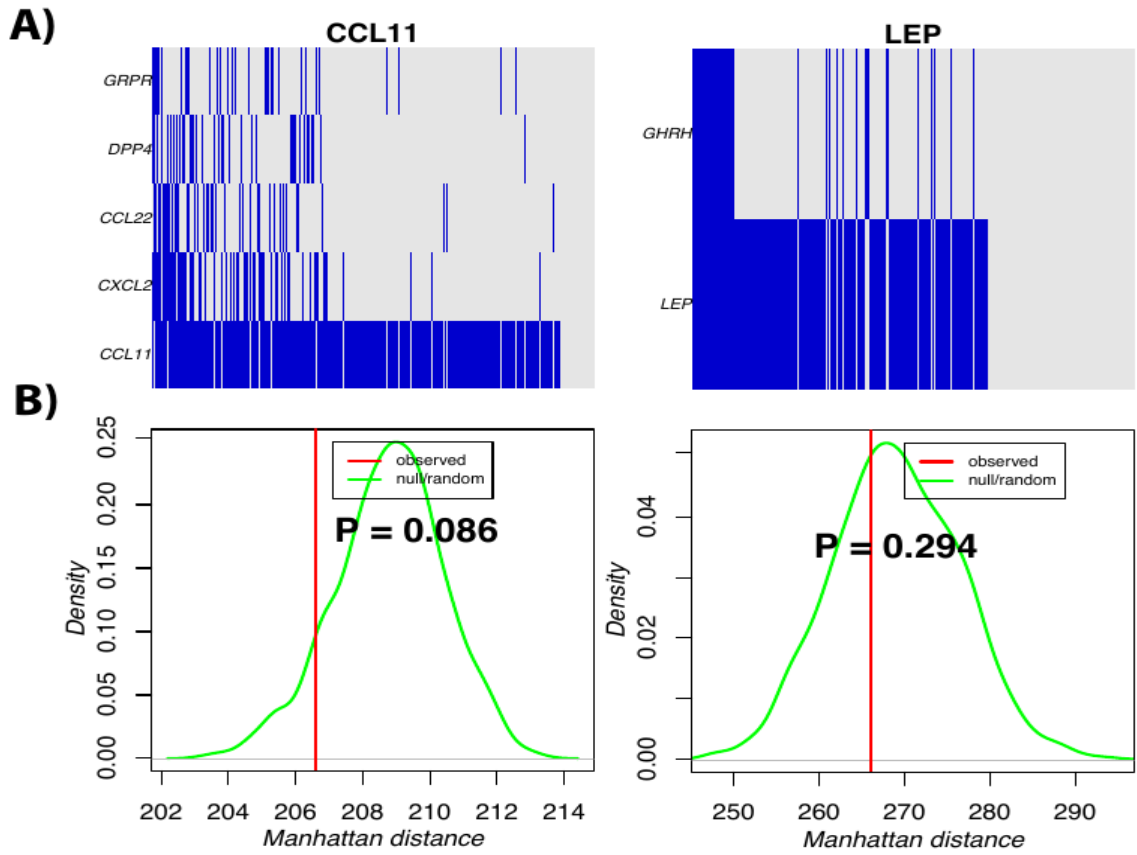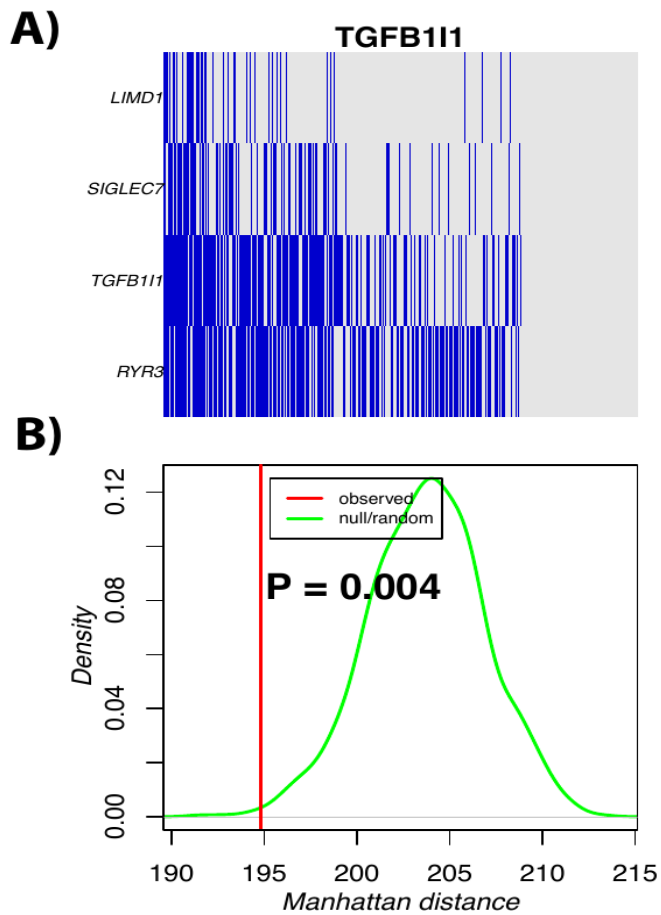

**Fig.S7: A)** Panels for each FEM depict heatmap representations of the binary deviation matrices with rows labeling FEM genes undergoing significant differential DNA methylation and differential expression, and with columns labeling tumour samples. In the heatmaps, a blue line indicates that the corresponding FEM gene in a given tumour, exhibits a significant deviation in DNAm and mRNA expression from the normal tissue reference. Grey indicates no significant deviation. **B)** The density plots for each FEM compare the observed average Manhattan distance of all gene pairs within a FEM (red line, as computed from the binary matrix representation shown in A)) with the corresponding Manhattan distance obtained by randomly permuting the samples within the binary matrix (green null curve depicts the density over 1000 different permutations). Estimate P-value is the fraction of permutations with an average Manhattan distance smaller than the observed distance.

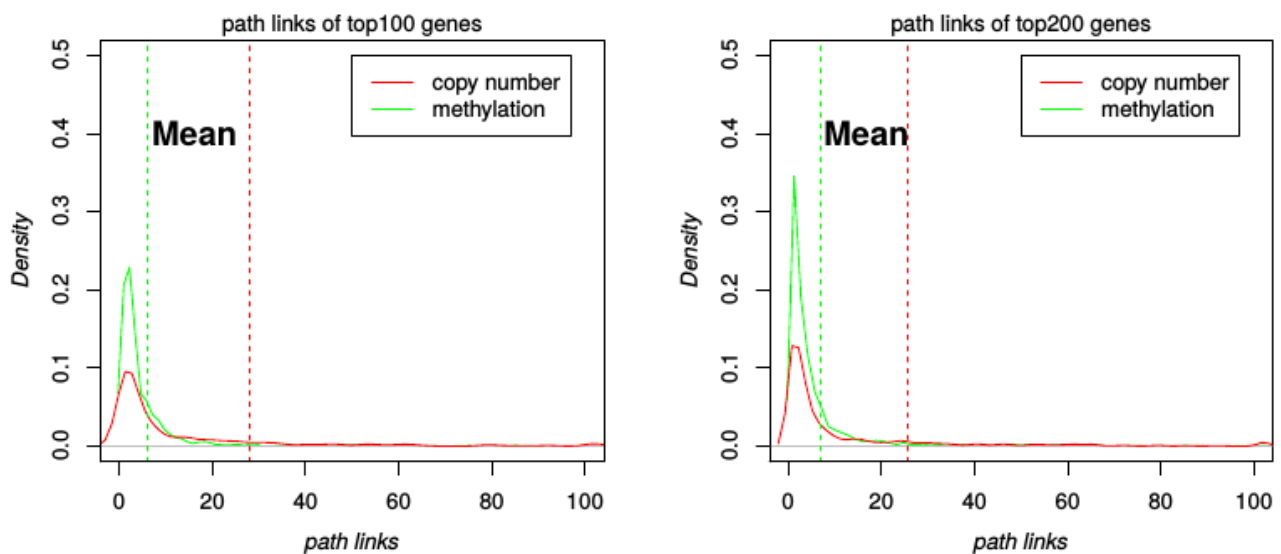

**Fig.S8:** Density plots of the shortest path, within a PPI network, between all gene pairs selected from the top 100 or top 200 differentially methylated or differentially amplified/deleted genes. The mean value of the shortest path between gene pairs is shown as a vertical line, with red indicating copy number and green indicating DNA methylation. Copy number and DNA methylation data are from TCGA breast cancer set.





## SUPPLEMENTARY TABLES:

| EntrezID(Seed) | Symbol(Seed)   | Size | Mod | P     | Genes                                                                                                                                                                                                                                                                                                                                                            |
|----------------|----------------|------|-----|-------|------------------------------------------------------------------------------------------------------------------------------------------------------------------------------------------------------------------------------------------------------------------------------------------------------------------------------------------------------------------|
| 7041           | <b>TGFB1I1</b> | 13   | 5.0 | 0.018 | TGFB1I1 TRAF4 GIT2 FKBP1A SVIL<br>HIPK3 SIGLEC7 RYR3 LIMD1 RPP14<br>POP5 RPP25 TBC1D8                                                                                                                                                                                                                                                                            |
| 3875           | <b>KRT18</b>   | 47   | 4.4 | 0.001 | KRT18 H2AFX EXOC8 KRT17 TGM2<br>KRT8 ANP32B ACTG2 PIPOX MYLK2<br>RPS6KA3 HIST1H1C HIST1H2AG<br>ACTN2 MYH7 PKD1 MYL3 DES<br>CEP250 MYH13 MYH2 CACNA1S H1F0<br>HIST1H2BD MYH11 TGIF2LY TPM1<br>MYH3 HIST1H1D HIST1H1T DEDD<br>TRO RHPN2 DNAJB6 TUT1 HMGCS2<br>WNK4 SYNM TRIM7 SYNC NEB KRT7<br>CLDN4 SLC12A3 DEDD2 CLDN2 ALG9                                      |
| 3952           | <b>LEP</b>     | 13   | 4.6 | 0.049 | LEP GHRL CRP UCN SIGLEC6 FCN2<br>GP6 GHRHR GHRH MLNR MLN<br>CRHBP GHSR                                                                                                                                                                                                                                                                                           |
| 6356           | <b>CCL11</b>   | 12   | 5.1 | 0.018 | CCL11 CCR2 ACKR2 DPP4 CCL22<br>CXCL2 CCR4 CCL28 GRP GRPR CCL25<br>CCR9                                                                                                                                                                                                                                                                                           |
| 11170          | <b>FAM107A</b> | 16   | 4.6 | 0.036 | FAM107A LDOC1 KRT15 TRIM37<br>BEGAIN HOOK2 ABLIM1 KRT81 USP2<br>WAC TEKT4 CCDC101 APEX2 ZNF417<br>PRPH ZNF253                                                                                                                                                                                                                                                    |
| 5624           | <b>PROC</b>    | 18   | 7.1 | 0     | PROC F8 F5 SERPINA5 PROS1 THBD<br>PROCR PF4 F10 SERPINA10 ASGR2<br>GAD2 MMRN1 F9 CERS2 F3 SRGN F11                                                                                                                                                                                                                                                               |
| 11167          | <b>FSTL1</b>   | 56   | 4.0 | 0.033 | FSTL1 BMP4 BMP2 BMPR1A FST<br>GREM2 BMPER MGP SOSTDC1 BMP6<br>BMP7 BAMBI CHRDL1 NOG GREM1<br>CHRD BMPR2 CCDC89 GDF5 TLL1<br>GDF6 INHBE ARSA TWSG1 LMX1A<br>BMPR1B GDF9 BMP15 ADPGK<br>ACVR2A ENG TGFB2 TGFB3 DCAF12<br>CER1 OC90 MERTK FMOD TGFB3<br>TGFB1 BMP3 DPT HTRA1 GDF2<br>ACVRL1 TGFBRAP1 MOS SERPINB9<br>POMK NBEA LRP10 LSM10 SLBP<br>LSM11 LTBP4 LSP1 |
| 25928          | SOSTDC1        | 10   | 5.7 | 0.012 | SOSTDC1 BMP4 BMP6 BAMBI BMP7<br>BMPER CHRDL1 FST INHBE GREM2                                                                                                                                                                                                                                                                                                     |

|      |             |    |     |       |                                                                                                                                                                                                                                                                                                                                                                                |
|------|-------------|----|-----|-------|--------------------------------------------------------------------------------------------------------------------------------------------------------------------------------------------------------------------------------------------------------------------------------------------------------------------------------------------------------------------------------|
| 4311 | <b>MME</b>  | 26 | 5.0 | 0.003 | MME EDN1 NPPA GAST VIP EDN2<br>ADM NPPC ADCYAP1 VIPR2<br>ADCYAP1R1 NPR2 KEL MMP1 EDNRA<br>EDN3 CMA1 EDNRB NPR3 CYSLTR2<br>SCTR SCT VIPR1 GNA12 ECE1 NPPB                                                                                                                                                                                                                       |
| 857  | <b>CAV1</b> | 58 | 3.7 | 0.046 | CAV1 EDNRB GRK5 TNFRSF1B<br>TNFRSF1A WNT3A LRP6 FZD5 F2R<br>CAV2 GJA1 GP2 GJA3 MALL BST1<br>PROCR GJB2 HTR1F WIF1 SLC1A3<br>KCTD12 ANTXR2 LTA WNT1 FZD1<br>FZD9 WNT7A LTB SFRP1 FZD6 WNT4<br>WNT2 RSPO1 DKK1 DKK2 RYK<br>IGFBP4 SFRP2 FZD8 ATP6AP2 WNT3<br>WNT5A PI4K2A LTBR WNT7B GJB6<br>ANTXR1 GJA5 FZD2 LRP5 FZD10<br>MESDC2 AVPR1B AVPR1A AVP<br>TNFRSF25 TNFSF15 PIP4K2B |
| 1674 | <b>DES</b>  | 47 | 4.4 | 0.004 | DES H2AFX KRT18 KRT17 KRT8<br>MYLK2 HIST1H1C HIST1H2AG ACTN2<br>MYH7 PKD1 MYL3 CEP250 MYH13<br>MYH2 CACNA1S H1F0 HIST1H2BD<br>MYH11 TGIF2LY TPM1 MYH3<br>HIST1H1D HIST1H1T NEB SYNM<br>SYNC TRIM7 TUT1 HMGCS2 TRO<br>WNK4 DEDD DNAJB6 PIPOX RHPN2<br>ANP32B KRT7 ACTG2 TGM2 EXOC8<br>CLDN4 SLC12A3 RPS6KA3 DEDD2<br>CLDN2 ALG9                                                 |

**Table.S1:** Properties of the 11 ER+ breast cancer associated FEMs, of which 9 are non-redundant (shown in boldface). For each FEM, we provide the Entrez gene ID and gene symbol of the seed gene, the size of the FEM, its modularity score, the P-value of significance of the modularity score (as assessed using 1000 Monte-Carlo randomisations), and the gene symbols of all genes making up the FEM.

**TGFB1I1 (13 genes)**

| EntrezID | Symbol  | stat(DNA <sub>m</sub> ) | P(DNA <sub>m</sub> ) | stat(mRNA) | P(mRNA)  | stat(Int) |
|----------|---------|-------------------------|----------------------|------------|----------|-----------|
| 7041     | TGFB1I1 | 29.42                   | 0                    | -10.55     | 2.00E-24 | 17.81     |
| 9618     | TRAF4   | 0.95                    | 0.344                | 12.63      | 1.00E-33 | 0         |
| 9815     | GIT2    | -1.61                   | 0.108                | -8.54      | 6.00E-17 | 0         |
| 2280     | FKBP1A  | 0.68                    | 0.494                | 0.2        | 0.844    | 0         |
| 6840     | SVIL    | -0.18                   | 0.854                | -14.9      | 1.00E-44 | 0         |
| 10114    | HIPK3   | -0.33                   | 0.745                | -8.01      | 4.00E-15 | 0         |
| 27036    | SIGLEC7 | -16.67                  | 5.00E-51             | 13.82      | 3.00E-39 | 12.4      |
| 6263     | RYR3    | 8.49                    | 2.00E-16             | -32.38     | 0        | 13.76     |
| 8994     | LIMD1   | -6.46                   | 2.00E-10             | 6.45       | 2.00E-10 | 5.13      |
| 11102    | RPP14   | -0.92                   | 0.357                | -4.35      | 2.00E-05 | 0         |
| 51367    | POP5    | -2.19                   | 0.029                | 0.38       | 0.701    | 1.21      |
| 54913    | RPP25   | 3.74                    | 2.00E-04             | 5.92       | 5.00E-09 | 0         |

|       |        |       |       |      |       |      |
|-------|--------|-------|-------|------|-------|------|
| 11138 | TBC1D8 | -0.65 | 0.515 | 0.05 | 0.958 | 0.34 |
|-------|--------|-------|-------|------|-------|------|

**KRT18 (47 genes)**

| EntrezID | Symbol    | stat(DNA <sub>m</sub> ) | P(DNA <sub>m</sub> ) | stat(mRNA) | P(mRNA)  | stat(Int) |
|----------|-----------|-------------------------|----------------------|------------|----------|-----------|
| 3875     | KRT18     | -23.9                   | 8.00E-88             | 19.46      | 8.00E-70 | 17.67     |
| 3014     | H2AFX     | 4.26                    | 2.00E-05             | 19.62      | 8.00E-71 | 0         |
| 149371   | EXOC8     | -0.35                   | 0.725                | 2.29       | 0.022    | 0.85      |
| 3872     | KRT17     | 5.9                     | 6.00E-09             | -10.25     | 3.00E-23 | 5.96      |
| 7052     | TGM2      | 0.67                    | 0.505                | 4.72       | 3.00E-06 | 0         |
| 3856     | KRT8      | -12.57                  | 4.00E-32             | 18.8       | 5.00E-66 | 11.81     |
| 10541    | ANP32B    | -1.02                   | 0.307                | 0.78       | 0.433    | 0.74      |
| 72       | ACTG2     | 6.39                    | 3.00E-10             | -19.95     | 1.00E-72 | 9.06      |
| 51268    | PIPOX     | 4.04                    | 6.00E-05             | 7.4        | 3.00E-13 | 0         |
| 85366    | MYLK2     | 9.35                    | 2.00E-19             | 11.98      | 1.00E-30 | 0         |
| 6197     | RPS6KA3   | -2.93                   | 0.003                | -16.47     | 6.00E-53 | 0         |
| 3006     | HIST1H1C  | -1.13                   | 0.258                | 12.06      | 5.00E-31 | 4.11      |
| 8969     | HIST1H2AG | -1.09                   | 0.275                | 10.24      | 3.00E-23 | 3.56      |
| 88       | ACTN2     | 13.99                   | 2.00E-38             | 3.81       | 1.00E-04 | 0         |
| 4625     | MYH7      | -3.29                   | 0.001                | -1.3       | 0.193    | 0         |
| 5310     | PKD1      | -2.38                   | 0.018                | -7.67      | 5.00E-14 | 0         |
| 4634     | MYL3      | 7.31                    | 9.00E-13             | -7.31      | 6.00E-13 | 5.8       |
| 1674     | DES       | 15.98                   | 1.00E-47             | -14.37     | 5.00E-42 | 12.21     |
| 11190    | CEP250    | 0.45                    | 0.656                | 10.79      | 2.00E-25 | 0         |
| 8735     | MYH13     | -14.16                  | 4.00E-39             | 0.88       | 0.381    | 7.34      |
| 4620     | MYH2      | -7.55                   | 2.00E-13             | -9.12      | 6.00E-19 | 0         |
| 779      | CACNA1S   | -1.64                   | 0.102                | -1.39      | 0.164    | 0         |
| 3005     | H1FO      | 5.55                    | 4.00E-08             | 9.8        | 1.00E-21 | 0         |
| 3017     | HIST1H2BD | -2.91                   | 0.004                | 20.11      | 1.00E-73 | 7.37      |
| 4629     | MYH11     | 8.31                    | 7.00E-16             | -21.65     | 8.00E-83 | 10.52     |
| 90655    | TGIF2LY   | -15.47                  | 3.00E-45             | 0.7        | 0.487    | 7.94      |
| 7168     | TPM1      | 4.69                    | 3.00E-06             | -6.72      | 3.00E-11 | 4.32      |
| 4621     | MYH3      | -4.18                   | 3.00E-05             | -12.46     | 8.00E-33 | 0         |
| 3007     | HIST1H1D  | 2.49                    | 0.013                | 10.27      | 2.00E-23 | 0         |
| 3010     | HIST1H1T  | 0.73                    | 0.467                | 4.01       | 7.00E-05 | 0         |
| 9191     | DEDD      | -4.51                   | 8.00E-06             | 7.39       | 4.00E-13 | 4.43      |
| 7216     | TRO       | -8.1                    | 3.00E-15             | -10.07     | 1.00E-22 | 0         |
| 85415    | RHPN2     | -0.19                   | 0.853                | 3.62       | 3.00E-04 | 1.16      |
| 10049    | DNAJB6    | -4.35                   | 2.00E-05             | 0.91       | 0.363    | 2.44      |
| 64852    | TUT1      | -1.6                    | 0.11                 | 3.08       | 0.002    | 1.71      |
| 3158     | HMGCS2    | -10.45                  | 2.00E-23             | -5.75      | 1.00E-08 | 0         |
| 65266    | WNK4      | 2.01                    | 0.045                | 5.21       | 2.00E-07 | 0         |
| 23336    | SYNM      | 3.69                    | 2.00E-04             | -27.32     | 0        | 9.88      |
| 81786    | TRIM7     | 1.66                    | 0.097                | -2.3       | 0.022    | 1.51      |
| 81493    | SYNC      | 1.08                    | 0.28                 | 0.75       | 0.456    | 0         |
| 4703     | NEB       | -3.26                   | 0.001                | 0          | 0.999    | 0         |
| 3855     | KRT7      | 5.52                    | 5.00E-08             | -1.41      | 0.159    | 3.17      |
| 1364     | CLDN4     | -16.29                  | 3.00E-49             | 8.4        | 2.00E-16 | 10.61     |
| 6559     | SLC12A3   | -2.58                   | 0.01                 | 4.92       | 1.00E-06 | 2.74      |
| 162989   | DEDD2     | -2.62                   | 0.009                | 12.74      | 4.00E-34 | 5.05      |
| 9075     | CLDN2     | -1.83                   | 0.068                | -10.99     | 2.00E-26 | 0         |
| 79796    | ALG9      | -1.65                   | 0.1                  | -8.64      | 3.00E-17 | 0         |

**LEP (13 genes)**



| EntrezID | Symbol  | stat(DNA <sub>m</sub> ) | P(DNA <sub>m</sub> ) | stat(mRNA) | P(mRNA)  | stat(Int) |
|----------|---------|-------------------------|----------------------|------------|----------|-----------|
| 3952     | LEP     | 22.22                   | 4.00E-79             | -21.8      | 9.00E-84 | 17.52     |
| 51738    | GHRL    | 1.5                     | 0.135                | 3.61       | 3.00E-04 | 0         |
| 1401     | CRP     | -14.98                  | 6.00E-43             | 0.45       | 0.655    | 7.62      |
| 7349     | UCN     | 15.61                   | 6.00E-46             | 11.69      | 2.00E-29 | 0         |
| 946      | SIGLEC6 | 3.62                    | 3.00E-04             | 1.32       | 0.188    | 0         |
| 2220     | FCN2    | -0.17                   | 0.862                | -6.15      | 1.00E-09 | 0         |
| 51206    | GP6     | 5.05                    | 6.00E-07             | 2.7        | 0.007    | 0         |
| 2692     | GHRHR   | -13.5                   | 3.00E-36             | 1.17       | 0.244    | 7.09      |
| 2691     | GHRH    | -5.63                   | 3.00E-08             | 4.65       | 4.00E-06 | 4.18      |
| 2862     | MLNR    | 9.75                    | 8.00E-21             | 3.36       | 8.00E-04 | 0         |
| 4295     | MLN     | -6.95                   | 1.00E-11             | -0.79      | 0.43     | 0         |
| 1393     | CRHBP   | -5.38                   | 1.00E-07             | -20.21     | 3.00E-74 | 0         |
| 2693     | GHSR    | 14.82                   | 3.00E-42             | 0.01       | 0.989    | 0         |

### CCL11 (12 genes)

| EntrezID | Symbol | stat(DNA <sub>m</sub> ) | P(DNA <sub>m</sub> ) | stat(mRNA) | P(mRNA)  | stat(Int) |
|----------|--------|-------------------------|----------------------|------------|----------|-----------|
| 6356     | CCL11  | -19.8                   | 1.00E-66             | 24.64      | 0        | 17.14     |
| 729230   | CCR2   | -3.1                    | 0.002                | -1.68      | 0.092    | 0         |
| 1238     | ACKR2  | -1.76                   | 0.079                | -9.1       | 7.00E-19 | 0         |
| 1803     | DPP4   | 5.94                    | 5.00E-09             | -12.98     | 3.00E-35 | 6.78      |
| 6367     | CCL22  | -11.61                  | 4.00E-28             | 3.6        | 3.00E-04 | 6.86      |
| 2920     | CXCL2  | 2.19                    | 0.029                | -23.89     | 1.00E-96 | 8.12      |
| 1233     | CCR4   | 11.92                   | 2.00E-29             | 11.68      | 3.00E-29 | 0         |
| 56477    | CCL28  | 0.05                    | 0.956                | -15.93     | 5.00E-50 | 4.71      |
| 2922     | GRP    | 11.99                   | 1.00E-29             | 4.56       | 6.00E-06 | 0         |
| 2925     | GRPR   | -2.98                   | 0.003                | 2.96       | 0.003    | 2.36      |
| 6370     | CCL25  | -1.77                   | 0.077                | 3.54       | 4.00E-04 | 1.93      |
| 10803    | CCR9   | 1.84                    | 0.066                | -1.69      | 0.091    | 1.42      |

### FAM107A (16 genes)

| EntrezID | Symbol  | stat(DNA <sub>m</sub> ) | P(DNA <sub>m</sub> ) | stat(mRNA) | P(mRNA)  | stat(Int) |
|----------|---------|-------------------------|----------------------|------------|----------|-----------|
| 11170    | FAM107A | 16.42                   | 7.00E-50             | -26.92     | 0        | 16.13     |
| 23641    | LDOC1   | 3.76                    | 2.00E-04             | 2.38       | 0.017    | 0         |
| 3866     | KRT15   | -0.59                   | 0.556                | -9.41      | 5.00E-20 | 0         |
| 4591     | TRIM37  | 0.77                    | 0.443                | 8.3        | 4.00E-16 | 0         |
| 57596    | BEGAIN  | 4.37                    | 1.00E-05             | -6.71      | 3.00E-11 | 4.16      |
| 29911    | HOOK2   | -0.67                   | 0.503                | -4.11      | 4.00E-05 | 0         |
| 3983     | ABLIM1  | 16.79                   | 1.00E-51             | -20.46     | 1.00E-75 | 14.41     |
| 3887     | KRT81   | 19.18                   | 2.00E-63             | -4.11      | 4.00E-05 | 10.8      |
| 9099     | USP2    | 0.88                    | 0.378                | -9.69      | 4.00E-21 | 3.29      |
| 51322    | WAC     | 9.17                    | 9.00E-19             | -6.31      | 5.00E-10 | 6.44      |
| 150483   | TEKT4   | -6.02                   | 3.00E-09             | 5          | 7.00E-07 | 4.48      |
| 112869   | CCDC101 | -3.23                   | 0.001                | 4.68       | 3.00E-06 | 2.99      |
| 27301    | APEX2   | -5.76                   | 1.00E-08             | 16.41      | 1.00E-52 | 7.71      |
| 147687   | ZNF417  | 0.97                    | 0.334                | -0.15      | 0.881    | 0.53      |
| 5630     | PRPH    | 4.92                    | 1.00E-06             | -5.44      | 7.00E-08 | 4.06      |
| 56242    | ZNF253  | 0.45                    | 0.651                | 2.59       | 0.01     | 0         |

### PROC (18 genes)

| EntrezID | Symbol | stat(DNA <sub>m</sub> ) | P(DNA <sub>m</sub> ) | stat(mRNA) | P(mRNA)  | stat(Int) |
|----------|--------|-------------------------|----------------------|------------|----------|-----------|
| 5624     | PROC   | -16.38                  | 1.00E-49             | 24.52      | #####    | 15.4      |
| 2157     | F8     | 7.17                    | 2.00E-12             | -20.94     | 1.00E-78 | 9.74      |

|       |           |       |          |        |          |       |
|-------|-----------|-------|----------|--------|----------|-------|
| 2153  | F5        | 6.92  | 1.00E-11 | 6.54   | 1.00E-10 | 0     |
| 5104  | SERPINA5  | -8.11 | 3.00E-15 | 0.34   | 0.735    | 4.15  |
| 5627  | PROS1     | 1.58  | 0.115    | -23.53 | 3.00E-94 | 7.71  |
| 7056  | THBD      | 1.52  | 0.129    | -10.1  | 1.00E-22 | 3.73  |
| 10544 | PROCR     | 0.36  | 0.717    | -9.06  | 9.00E-19 | 2.85  |
| 5196  | PF4       | 2.21  | 0.028    | -4.8   | 2.00E-06 | 2.51  |
| 2159  | F10       | 12.17 | 2.00E-30 | -19.55 | 2.00E-70 | 11.83 |
| 51156 | SERPINA10 | -2.13 | 0.033    | 2.23   | 0.026    | 1.72  |
| 433   | ASGR2     | -6.07 | 2.00E-09 | 3.8    | 2.00E-04 | 4.16  |
| 2572  | GAD2      | 7.29  | 1.00E-12 | -0.4   | 0.689    | 3.77  |
| 22915 | MMRN1     | 3.85  | 1.00E-04 | -18.12 | 4.00E-62 | 7.26  |
| 2158  | F9        | 1.34  | 0.181    | 1.28   | 0.201    | 0     |
| 29956 | CERS2     | 3.5   | 5.00E-04 | 21.16  | 7.00E-80 | 0     |
| 2152  | F3        | -1.02 | 0.307    | -16.42 | 1.00E-52 | 0     |
| 5552  | SRGN      | 8.75  | 2.00E-17 | -6.1   | 2.00E-09 | 6.17  |
| 2160  | F11       | -5.42 | 9.00E-08 | 2.67   | 0.008    | 3.49  |

### FSTL1 (56 genes)

| EntrezID | Symbol  | stat(DNA <sub>m</sub> ) | P(DNA <sub>m</sub> ) | stat(mRNA) | P(mRNA)  | stat(Int) |
|----------|---------|-------------------------|----------------------|------------|----------|-----------|
| 11167    | FSTL1   | 22.44                   | 3.00E-80             | -11.54     | 1.00E-28 | 14.61     |
| 652      | BMP4    | -0.09                   | 0.929                | -4.93      | 1.00E-06 | 0         |
| 650      | BMP2    | 7.47                    | 3.00E-13             | -21.19     | 4.00E-80 | 9.96      |
| 657      | BMPR1A  | 1.58                    | 0.114                | -10.16     | 6.00E-23 | 3.78      |
| 10468    | FST     | 7.72                    | 5.00E-14             | -4.44      | 1.00E-05 | 5.16      |
| 64388    | GREM2   | 3.51                    | 5.00E-04             | -13.72     | 9.00E-39 | 5.79      |
| 168667   | BMPER   | 6.99                    | 8.00E-12             | -16.04     | 1.00E-50 | 8.21      |
| 4256     | MGP     | 3.61                    | 3.00E-04             | -8.82      | 7.00E-18 | 4.4       |
| 25928    | SOSTDC1 | 19.56                   | 2.00E-65             | -16.29     | 5.00E-52 | 14.57     |
| 654      | BMP6    | 5.46                    | 7.00E-08             | -20.74     | 2.00E-77 | 8.83      |
| 655      | BMP7    | 6.83                    | 2.00E-11             | -3.48      | 5.00E-04 | 4.44      |
| 25805    | BAMBI   | 0.31                    | 0.753                | 3.04       | 0.002    | 0         |
| 91851    | CHRD1   | 9.74                    | 8.00E-21             | -20.88     | 3.00E-78 | 11.01     |
| 9241     | NOG     | -0.54                   | 0.586                | -3.45      | 6.00E-04 | 0         |
| 26585    | GREM1   | 12.28                   | 7.00E-31             | 6.47       | 2.00E-10 | 0         |
| 8646     | CHRD    | -3.96                   | 8.00E-05             | 7.46       | 2.00E-13 | 4.17      |
| 659      | BMPR2   | 2.59                    | 0.01                 | -7.33      | 5.00E-13 | 3.45      |
| 220388   | CCDC89  | 12.86                   | 2.00E-33             | -5.74      | 1.00E-08 | 8.12      |
| 8200     | GDF5    | 2                       | 0.046                | -14.05     | 2.00E-40 | 5.13      |
| 7092     | TLL1    | 1.91                    | 0.057                | -11.14     | 5.00E-27 | 4.23      |
| 392255   | GDF6    | 6.37                    | 4.00E-10             | 0.77       | 0.443    | 0         |
| 83729    | INHBE   | -0.66                   | 0.51                 | 2.44       | 0.015    | 1.05      |
| 410      | ARSA    | -0.07                   | 0.941                | 3.91       | 1.00E-04 | 1.19      |
| 57045    | TWSG1   | 6.31                    | 6.00E-10             | 2.33       | 0.02     | 0         |
| 4009     | LMX1A   | 10.37                   | 3.00E-23             | -13.33     | 7.00E-37 | 9.11      |
| 658      | BMPR1B  | 3.44                    | 6.00E-04             | 9.26       | 2.00E-19 | 0         |
| 2661     | GDF9    | -1.67                   | 0.095                | 7.03       | 4.00E-12 | 2.9       |
| 9210     | BMP15   | -4.7                    | 3.00E-06             | 0.5        | 0.62     | 2.5       |
| 83440    | ADPGK   | -3.74                   | 2.00E-04             | 6.66       | 5.00E-11 | 3.83      |
| 92       | ACVR2A  | -3.11                   | 0.002                | -16.04     | 1.00E-50 | 0         |
| 2022     | ENG     | 13.74                   | 3.00E-37             | -7.06      | 3.00E-12 | 8.94      |
| 7042     | TGFB2   | 0.81                    | 0.418                | -4.63      | 4.00E-06 | 1.77      |
| 7049     | TGFBR3  | -0.2                    | 0.845                | -19.23     | 2.00E-68 | 0         |
| 25853    | DCAF12  | -3.81                   | 2.00E-04             | 6.06       | 2.00E-09 | 3.69      |

|        |          |        |          |        |          |       |
|--------|----------|--------|----------|--------|----------|-------|
| 9350   | CER1     | -5.92  | 6.00E-09 | -0.89  | 0.375    | 0     |
| 729330 | OC90     | -12.16 | 2.00E-30 | -1.19  | 0.234    | 0     |
| 10461  | MERTK    | 2.7    | 0.007    | -12.87 | 1.00E-34 | 5.14  |
| 2331   | FMOD     | 2.07   | 0.039    | -10.39 | 7.00E-24 | 4.09  |
| 7043   | TGFB3    | 3.52   | 5.00E-04 | 10.51  | 2.00E-24 | 0     |
| 7040   | TGFB1    | 1.79   | 0.074    | 12.1   | 3.00E-31 | 0     |
| 651    | BMP3     | 6.46   | 2.00E-10 | -18.71 | 2.00E-65 | 8.73  |
| 1805   | DPT      | 12.06  | 6.00E-30 | -18.19 | 2.00E-62 | 11.38 |
| 5654   | HTRA1    | 1.19   | 0.236    | -1.47  | 0.143    | 1.02  |
| 2658   | GDF2     | -5.21  | 3.00E-07 | 1.03   | 0.305    | 2.91  |
| 94     | ACVRL1   | 8.35   | 5.00E-16 | -13.34 | 6.00E-37 | 8.1   |
| 9392   | TGFBRAP1 | 0.98   | 0.326    | -1.83  | 0.068    | 1.03  |
| 4342   | MOS      | 10.47  | 1.00E-23 | -1.28  | 0.201    | 5.61  |
| 5272   | SERPINB9 | 0.4    | 0.688    | -4.5   | 8.00E-06 | 1.52  |
| 84197  | POMK     | -0.63  | 0.532    | 4.02   | 6.00E-05 | 1.49  |
| 26960  | NBEA     | 5.2    | 3.00E-07 | -2.84  | 0.005    | 3.44  |
| 26020  | LRP10    | -2.28  | 0.023    | -0.51  | 0.611    | 0     |
| 84967  | LSM10    | -0.23  | 0.817    | 8.51   | 8.00E-17 | 2.62  |
| 7884   | SLBP     | 3.2    | 0.001    | 9.58   | 1.00E-20 | 0     |
| 134353 | LSM11    | -2.1   | 0.036    | 2.71   | 0.007    | 1.85  |
| 8425   | LTBP4    | -7.85  | 2.00E-14 | -19.94 | 1.00E-72 | 0     |
| 4046   | LSP1     | -9.81  | 4.00E-21 | -1.32  | 0.186    | 0     |

#### MME (26 genes)

| EntrezID | Symbol    | stat(DNA <sub>m</sub> ) | P(DNA <sub>m</sub> ) | stat(mRNA) | P(mRNA)  | stat(Int) |
|----------|-----------|-------------------------|----------------------|------------|----------|-----------|
| 4311     | MME       | 9.87                    | 3.00E-21             | -26.63     | 0        | 12.77     |
| 1906     | EDN1      | 0.35                    | 0.724                | -15.58     | 3.00E-48 | 4.76      |
| 4878     | NPPA      | 2.56                    | 0.011                | 0.42       | 0.677    | 0         |
| 2520     | GAST      | -4.58                   | 6.00E-06             | 4.03       | 6.00E-05 | 3.47      |
| 7432     | VIP       | 3.32                    | 0.001                | -14.49     | 1.00E-42 | 5.92      |
| 1907     | EDN2      | -7.33                   | 8.00E-13             | 13.98      | 5.00E-40 | 7.77      |
| 133      | ADM       | 0.38                    | 0.701                | -15.17     | 5.00E-46 | 4.65      |
| 4880     | NPPC      | 2.33                    | 0.02                 | 2.72       | 0.007    | 0         |
| 116      | ADCYAP1   | 13.49                   | 4.00E-36             | -1.14      | 0.254    | 7.08      |
| 7434     | VIPR2     | 11.54                   | 9.00E-28             | -3.85      | 1.00E-04 | 6.9       |
| 117      | ADCYAP1R1 | 5.33                    | 1.00E-07             | -20.16     | 6.00E-74 | 8.59      |
| 4882     | NPR2      | 16.25                   | 5.00E-49             | -20.47     | 8.00E-76 | 14.15     |
| 3792     | KEL       | -3.91                   | 1.00E-04             | 2.21       | 0.027    | 2.6       |
| 4312     | MMP1      | -6.56                   | 1.00E-10             | 18.82      | 4.00E-66 | 8.81      |
| 1909     | EDNRA     | 14.62                   | 3.00E-41             | 1.59       | 0.111    | 0         |
| 1908     | EDN3      | 14.62                   | 3.00E-41             | -16.71     | 3.00E-54 | 12.22     |
| 1215     | CMA1      | -8.52                   | 1.00E-16             | -15.49     | 9.00E-48 | 0         |
| 1910     | EDNRB     | -13.04                  | 4.00E-34             | -22.32     | 6.00E-87 | 0         |
| 4883     | NPR3      | 2.79                    | 0.005                | -9.38      | 6.00E-20 | 4.15      |
| 57105    | CYSLTR2   | -6.46                   | 2.00E-10             | -1.62      | 0.106    | 0         |
| 6344     | SCTR      | 12.04                   | 7.00E-30             | -12.63     | 1.00E-33 | 9.73      |
| 6343     | SCT       | 18.14                   | 3.00E-58             | 14.4       | 4.00E-42 | 0         |
| 7433     | VIPR1     | -3.35                   | 9.00E-04             | -10.51     | 2.00E-24 | 0         |
| 2768     | GNA12     | -1.3                    | 0.195                | -3.22      | 0.001    | 0         |
| 1889     | ECE1      | -3.28                   | 0.001                | -6.18      | 1.00E-09 | 0         |
| 4879     | NPPB      | 2.73                    | 0.007                | 1.71       | 0.088    | 0         |

#### CAV1 (58 genes)

| EntrezID | Symbol   | stat(DNA <sub>m</sub> ) | P(DNA <sub>m</sub> ) | stat(mRNA) | P(mRNA)  | stat(Int) |
|----------|----------|-------------------------|----------------------|------------|----------|-----------|
| 857      | CAV1     | 7.58                    | 1.00E-13             | -29.98     | 0        | 12.6      |
| 1910     | EDNRB    | -13.04                  | 4.00E-34             | -22.32     | 6.00E-87 | 0         |
| 2869     | GRK5     | -1.13                   | 0.259                | -18.28     | 5.00E-63 | 0         |
| 7133     | TNFRSF1B | 5.92                    | 6.00E-09             | -9.97      | 4.00E-22 | 5.89      |
| 7132     | TNFRSF1A | -3.55                   | 4.00E-04             | -5         | 7.00E-07 | 0         |
| 89780    | WNT3A    | 7.91                    | 1.00E-14             | 0.87       | 0.384    | 0         |
| 4040     | LRP6     | 0.51                    | 0.61                 | -12.91     | 7.00E-35 | 4.05      |
| 7855     | FZD5     | 0.35                    | 0.727                | -12.69     | 7.00E-34 | 3.91      |
| 2149     | F2R      | 1.71                    | 0.088                | 9.56       | 1.00E-20 | 0         |
| 858      | CAV2     | 0.41                    | 0.683                | -30.6      | 0        | 9.2       |
| 2697     | GJA1     | 4.91                    | 1.00E-06             | 0.57       | 0.571    | 0         |
| 2813     | GP2      | -19.24                  | 8.00E-64             | 8.96       | 2.00E-18 | 12.25     |
| 2700     | GJA3     | 3.79                    | 2.00E-04             | 10.61      | 9.00E-25 | 0         |
| 7851     | MALL     | 14.75                   | 7.00E-42             | -14.05     | 2.00E-40 | 11.51     |
| 683      | BST1     | 7.08                    | 4.00E-12             | -10.87     | 8.00E-26 | 6.74      |
| 10544    | PROCR    | 0.36                    | 0.717                | -9.06      | 9.00E-19 | 2.85      |
| 2706     | GJB2     | 2.8                     | 0.005                | 22.46      | 9.00E-88 | 0         |
| 3355     | HTR1F    | -2.3                    | 0.022                | -2.55      | 0.011    | 0         |
| 11197    | WIF1     | 10.79                   | 8.00E-25             | -18.77     | 7.00E-66 | 10.91     |
| 6507     | SLC1A3   | 13.61                   | 1.00E-36             | -11.24     | 2.00E-27 | 10.11     |
| 115207   | KCTD12   | 1.75                    | 0.08                 | -19.08     | 1.00E-67 | 6.49      |
| 118429   | ANTXR2   | 4.57                    | 6.00E-06             | -19.52     | 3.00E-70 | 8.03      |
| 4049     | LTA      | -5.38                   | 1.00E-07             | 9.16       | 4.00E-19 | 5.38      |
| 7471     | WNT1     | 8.84                    | 1.00E-17             | -4.27      | 2.00E-05 | 5.68      |
| 8321     | FZD1     | -0.8                    | 0.424                | -6.92      | 9.00E-12 | 0         |
| 8326     | FZD9     | 4.12                    | 4.00E-05             | -9.52      | 2.00E-20 | 4.86      |
| 7476     | WNT7A    | 5.8                     | 1.00E-08             | 1.97       | 0.05     | 0         |
| 4050     | LTB      | -2.02                   | 0.044                | 8.64       | 3.00E-17 | 3.55      |
| 6422     | SFRP1    | 12.35                   | 3.00E-31             | -21.51     | 5.00E-82 | 12.5      |
| 8323     | FZD6     | -1.66                   | 0.098                | -2.18      | 0.029    | 0         |
| 54361    | WNT4     | 1.81                    | 0.071                | 3          | 0.003    | 0         |
| 7472     | WNT2     | 16.17                   | 1.00E-48             | 7.22       | 1.00E-12 | 0         |
| 284654   | RSPO1    | 6.41                    | 3.00E-10             | -9.21      | 3.00E-19 | 5.91      |
| 22943    | DKK1     | -0.29                   | 0.769                | -1.07      | 0.285    | 0         |
| 27123    | DKK2     | 8.39                    | 4.00E-16             | -0.8       | 0.424    | 4.43      |
| 6259     | RYK      | 0.87                    | 0.386                | -14.09     | 1.00E-40 | 4.58      |
| 3487     | IGFBP4   | 1.69                    | 0.092                | -0.45      | 0.653    | 0.98      |
| 6423     | SFRP2    | 19.57                   | 2.00E-65             | 4.79       | 2.00E-06 | 0         |
| 8325     | FZD8     | 2.87                    | 0.004                | -4.71      | 3.00E-06 | 2.82      |
| 10159    | ATP6AP2  | 5.18                    | 3.00E-07             | 8.04       | 3.00E-15 | 0         |
| 7473     | WNT3     | 1.93                    | 0.054                | 7.04       | 4.00E-12 | 0         |
| 7474     | WNT5A    | 0.28                    | 0.782                | 0.44       | 0.663    | 0         |
| 55361    | PI4K2A   | -0.92                   | 0.359                | 1.53       | 0.127    | 0.91      |
| 4055     | LTBR     | 3.85                    | 1.00E-04             | 4.52       | 7.00E-06 | 0         |
| 7477     | WNT7B    | -1.19                   | 0.236                | 13.06      | 1.00E-35 | 4.43      |
| 10804    | GJB6     | 4.75                    | 3.00E-06             | -0.9       | 0.368    | 2.64      |
| 84168    | ANTXR1   | 1.62                    | 0.105                | -1.01      | 0.315    | 1.11      |
| 2702     | GJA5     | 4.79                    | 2.00E-06             | -4.04      | 6.00E-05 | 3.58      |
| 2535     | FZD2     | 14.88                   | 2.00E-42             | 16.78      | 1.00E-54 | 0         |
| 4041     | LRP5     | -2.53                   | 0.012                | -10.13     | 8.00E-23 | 0         |
| 11211    | FZD10    | 7.63                    | 1.00E-13             | -0.64      | 0.523    | 4         |
| 23184    | MESDC2   | -2.68                   | 0.008                | 8.08       | 2.00E-15 | 3.72      |



|      |          |       |          |       |          |       |
|------|----------|-------|----------|-------|----------|-------|
| 553  | AVPR1B   | -6.42 | 3.00E-10 | 0.2   | 0.842    | 3.27  |
| 552  | AVPR1A   | 18.95 | 2.00E-62 | -9.49 | 2.00E-20 | 12.26 |
| 551  | AVP      | -4.4  | 1.00E-05 | 4.38  | 1.00E-05 | 3.49  |
| 8718 | TNFRSF25 | 1.4   | 0.163    | -0.92 | 0.358    | 0.97  |
| 9966 | TNFSF15  | -7.95 | 1.00E-14 | -0.76 | 0.448    | 0     |
| 8396 | PIP4K2B  | -0.55 | 0.582    | -3.98 | 7.00E-05 | 0     |

**Table.S2:** Details of the 9 non-redundant ER+ breast cancer associated FEMs. For each FEM, labeled by its seed gene, we provide details of all genes making up the FEM, including their Entrez gene ID, their gene symbol, the t-statistic and P-value of differential DNA methylation and gene expression, as well as the integrated statistic.

| Data Types                               | Clusters predicted | Adjusted Rand Index of luminal subtypes |
|------------------------------------------|--------------------|-----------------------------------------|
| DNAm + mRNA (TCGA)                       | 2                  | 0.262                                   |
| Copy number+mRNA (METABRIC)              | 10                 | 0.072                                   |
| Copy number +mRNA IC1 and IC3 (METABRIC) | NA                 | 0.507                                   |

**Table.S3:** Table of ARI (Adjusted Rand Index) values showing the classification accuracy of luminal subtypes across inferred clusters and using different data types. The number of clusters were predicted using the POD score of the icluster algorithm. Last row gives the ARI value for intrinsic clusters 1 and 3 of the METABRIC study (Curtis et al Nature 2012).

#### Normal – LumA subtype (FEM)

| FEM Seed | Size | Mod(LumA) | P(LumA) | Mod(LumB) | P(LumB) |
|----------|------|-----------|---------|-----------|---------|
| KRT18    | 49   | 8.38      | 0.009   | 4.29      | 0.003   |
| TGFB1I1  | 13   | 9.71      | 0.025   | 5.16      | 0.012   |
| CCL11    | 12   | 10.18     | 0.02    | 4.98      | 0.021   |
| LEP      | 13   | 8.96      | 0.049   | 3.90      | 0.114   |
| PROC     | 18   | 13.92     | <0.001  | 6.89      | 0.001   |
| FAM107A  | 16   | 9.18      | 0.034   | 4.7       | 0.049   |
| SOSTDC1  | 10   | 10.99     | 0.011   | 5.95      | 0.006   |
| FSTL1    | 56   | 7.60      | 0.041   | 4.03      | 0.02    |
| MME      | 23   | 9.41      | 0.009   | 5.76      | 0.002   |
| CAV1     | 58   | 7.46      | 0.049   | 3.69      | 0.044   |

#### Normal – LumB subtype (FEM)

| FEM Seed | Size | Mod(LumB) | P(LumB) | Mod(LumA) | P(LumA) |
|----------|------|-----------|---------|-----------|---------|
| TGFB1I1  | 13   | 10.32     | 0.02    | 4.854     | 0.028   |
| FAM107A  | 19   | 8.98      | 0.031   | 4.407     | 0.035   |
| CCL11    | 16   | 8.85      | 0.041   | 3.888     | 0.114   |

|         |    |       |        |       |        |
|---------|----|-------|--------|-------|--------|
| KRT18   | 49 | 8.51  | 0.007  | 4.138 | 0.005  |
| SOSTDC1 | 57 | 8.01  | 0.024  | 3.778 | 0.053  |
| FSTL1   | 57 | 8.01  | 0.03   | 3.778 | 0.039  |
| LNX1    | 27 | 10.90 | 0.011  | 2.341 | 0.582  |
| PROC    | 24 | 12.90 | <0.001 | 6.548 | <0.001 |
| VWF     | 13 | 11.44 | 0.009  | 6.113 | 0.002  |
| CAV1    | 60 | 7.59  | 0.036  | 3.846 | 0.021  |
| MYH11   | 49 | 8.51  | 0.011  | 4.138 | 0.007  |
| MME     | 27 | 10.87 | <0.001 | 4.304 | 0.031  |
| GPRASP1 | 36 | 10.63 | 0.007  | 4.613 | 0.022  |
| DES     | 49 | 8.51  | 0.008  | 4.138 | 0.008  |

**Table.S4:** Cross-validation of luminal-subtype specific FEMs. Top table lists the FEMs inferred by comparing luminal-A ER+ breast cancers to normals, listing their modularities and Monte-Carlo estimated P-values of significance, plus their modularities and P-values obtained by comparing luminal-B ER+ breast cancer to normals. Similarly, the lower table lists the FEMs inferred by comparing luminal-A ER+ breast cancers to normals, listing their modularities and Monte-Carlo estimated P-values of significance, plus their modularities and P-values obtained by comparing luminal-A ER+ breast cancer to normals. Observe how most of the luminal-specific FEMs validate in the other luminal-subtype, indicating that both luminal subtypes share the same FEMs.
